# Supplementary material for: sRNA OsiA Stabilizes Catalase mRNA during Oxidative Stress Response of Deincoccus radiodurans R1
Source: PubMed Central journal article supplement (PMC6843392; doi:10.3390/microorganisms7100422), 2019-10-08
Supplement: microorganisms-07-00422-s001.pdf [file microorganisms-07-00422-s001.pdf]

# sRNA OsiA stabilizes catalase mRNA during oxidative stress response of *Deinococcus radiodurans* R1

Yun Chen<sup>1,2</sup>, Dong Xue<sup>2</sup>, Wenjie Sun<sup>1</sup>, Jiahui Han<sup>2</sup>, Jiang Li<sup>2</sup>, Ruyu Gao<sup>2</sup>, Zhengfu Zhou<sup>2</sup>, Wei Zhang<sup>2</sup>, Ming Chen<sup>2</sup>, Min Lin<sup>2</sup>, Jinwang<sup>2\*</sup>, Kaijing Zuo<sup>1\*</sup>,

<sup>1</sup> Department of Plant Science, School of Agriculture and Biology, Shanghai Jiao Tong University, Shanghai 200240, China.

[chenyun0402ye@163.com](mailto:chenyun0402ye@163.com) (Y.C.); [sunwenjie\\_007@163.com](mailto:sunwenjie_007@163.com) (W.S.); [kjzuo@sjtu.edu.cn](mailto:kjzuo@sjtu.edu.cn) (K.Z)

<sup>2</sup> Biotechnology Research Institute, Chinese Academy of Agricultural Sciences, Beijing, China; [xue\\_dong\\_kevin@126.com](mailto:xue_dong_kevin@126.com) (D.X.); [13121257599@163.com](mailto:13121257599@163.com) (J.H.); [1329090356@qq.com](mailto:1329090356@qq.com) (J.L.); [rainie0327@mail.dlut.edu.cn](mailto:rainie0327@mail.dlut.edu.cn) (R.G.); [zhouzhengfu@caas.cn](mailto:zhouzhengfu@caas.cn) (Z.Z.); [zhangwei01@caas.cn](mailto:zhangwei01@caas.cn) (W.Z.); [chenming01@caas.cn](mailto:chenming01@caas.cn) (M.C.); [linmin57@vip.163.com](mailto:linmin57@vip.163.com) (M.L.); [wangjin@caas.cn](mailto:wangjin@caas.cn) (J.W.)

\* Correspondence: [wangjin@caas.cn](mailto:wangjin@caas.cn); [kjzuo@sjtu.edu.cn](mailto:kjzuo@sjtu.edu.cn)

**Supplementary Table 1.** Small RNA sequencing and classification in *D. radiodurans* R1.

| Sequencing data           | Control (CDR) | H <sub>2</sub> O <sub>2</sub> treatment (TDR) |
|---------------------------|---------------|-----------------------------------------------|
| Number of raw reads       | 38,097,349    | 44,092,613                                    |
| Number of clean reads     | 37,603,677    | 43,287,070                                    |
| Percentage of clean reads | 98.70%        | 98.17%                                        |
| Size of clean reads       | 5.64 Gbp      | 6.49 Gbp                                      |

**Supplementary Table 2.** Information of 24 sRNAs involved in oxidative stress response..

| IGR_ID   | Start   | End     | upgene   | downgene | strand | foldchange | p-value   | q-value   |
|----------|---------|---------|----------|----------|--------|------------|-----------|-----------|
| IGR_3053 | 358768  | 358969  | DR_A0243 | DR_A0244 | +      | 0.718681   | 1.57E-08  | 4.14E-09  |
| IGR_2205 | 678996  | 678583  | DR_2032  | DR_2031  | -      | -1.03092   | 2.92E-10  | 8.35E-11  |
| IGR_1662 | 1218295 | 1217830 | DR_1490  | DR_1489  | -      | 0.069874   | 0.733049  | 0.09144   |
| IGR_1449 | 1437594 | 1437664 | DR_1275  | DR_1276  | +      | -2.71252   | 0         | 0         |
| IGR_1916 | 953162  | 952832  | DR_1743  | DR_1742  | -      | -0.14034   | 0.079399  | 0.011909  |
| IGR_1612 | 1279547 | 1279884 | DR_1439  | DR_1440  | +      | 0.92522    | 5.79E-103 | 6.59E-103 |
| IGR_2590 | 305214  | 305487  | DR_2417m | DR_2418  | +      | -1.99071   | 0         | 0         |
| IGR_884  | 1994107 | 1994359 | DR_0713  | DR_0714  | +      | 0.112089   | 0.495287  | 0.064129  |
| IGR_2572 | 323499  | 323822  | DR_2399  | DR_2400  | +      | -0.96447   | 2.76E-17  | 1.02E-17  |
| IGR_2408 | 494640  | 494504  | DR_2235  | DR_2234  | -      | -1.50432   | 1.77E-19  | 6.99E-20  |
| IGR_771  | 2113157 | 2113436 | DR_0600  | DR_0601  | +      | -1.04859   | 5.86E-51  | 3.90E-51  |
| IGR_2060 | 816490  | 816280  | DR_1887  | DR_1886  | -      | 0.082214   | 0.421874  | 0.055479  |
| IGR_1174 | 1704381 | 1704423 | DR_1002  | DR_1003  | +      | -0.22      | 0.297456  | 0.040242  |
| IGR_2479 | 419902  | 420112  | DR_2306  | DR_2307  | +      | -0.78763   | 1.76E-05  | 3.80E-06  |

|          |         |         |          |          |   |          |           |           |
|----------|---------|---------|----------|----------|---|----------|-----------|-----------|
| IGR_2150 | 725671  | 725829  | DR_1976  | DR_1977  | + | -0.73333 | 5.43E-24  | 2.38E-24  |
| IGR_2690 | 207317  | 207620  | DR_2516  | DR_2517  | + | -0.30675 | 0.230451  | 0.031796  |
| IGR_2389 | 510360  | 510248  | DR_2217  | DR_2216  | - | -0.04801 | 0.505675  | 0.065342  |
| IGR_76   | 160671  | 160543  | DR_B0087 | DR_B0086 | - | /        | /         | /         |
| IGR_585  | 2309594 | 2309548 | DR_0415  | DR_0414  | - | -1.20345 | 7.47E-26  | 3.40E-26  |
| IGR_2012 | 856316  | 856568  | DR_1838  | DR_1839  | + | 0.717014 | 1.26E-44  | 7.77E-45  |
| IGR_373  | 2519079 | 2519185 | DR_0202  | DR_0203  | + | /        | /         | /         |
| IGR_826  | 2058350 | 2058826 | DR_0655  | DR_0656  | + | 0.787837 | 0.000166  | 3.32E-05  |
| IGR_1951 | 916929  | 916729  | DR_1778  | DR_1777  | - | 2.194254 | 1.30E-305 | 3.92E-305 |
| IGR_388  | 2506155 | 2505865 | DR_0218  | DR_0217  | - | 0.232319 | 6.77E-24  | 2.96E-24  |

**Supplementary Table3.** KEGG pathway analysis of oxidative response sRNAs in *D. radiodurans* R1.

| Pathway                 | Pathway ID. | sRNA/Product of target gene pair                                                                                                                                                                                                                                                                                                                                                                     | P-value    | Q-value      |
|-------------------------|-------------|------------------------------------------------------------------------------------------------------------------------------------------------------------------------------------------------------------------------------------------------------------------------------------------------------------------------------------------------------------------------------------------------------|------------|--------------|
| Peroxisome              | K04146      | OsiA/DR_1998; OsiA/DR_A0202<br>IGR_1662/DR_A0259; IGR_2590/DR_A0309<br>IGR_1662/DR_1168; IGR_1912/DR_1279<br>IGR_2205/DR_1350; IGR_1174/DR_1540<br>IGR_2389/DR_1546; IGR_1916/DR_1692                                                                                                                                                                                                                | 0.6787235  | 9.848279e-01 |
| Mismatch repair         | KO03430     | IGR_1612/DR_0001; IGR_76/DR_0099<br>IGR_1662/DR_0100; IGR_884/DR_0186<br>IGR_585/DR_0315; OsiA/DR_0316<br>IGR_2479/DR_0507; IGR_2572/DR_0607<br>IGR_2150/DR_0822; IGR_1612/DR_0856<br>IGR_1662/DR_1039; IGR_2012/DR_1126<br>IGR_1916/DR_1244; IGR_1449/DR_1696<br>IGR_1449/DR_1775; IGR_2590/DR_1778<br>IGR_2408/DR_1943; IGR_2572/DR_1976<br>IGR_2205/DR_2069; IGR_2205/DR_2410<br>IGR_2205/DR_2586 | 0.4417978  | 9.848279e-01 |
| Glutathione metabolism  | Ko00480     | IGR_1916/DR_0148; IGR_2690/DR_0651<br>IGR_771/DR_0692; IGR_771/DR_0717<br>IGR_2150/DR_1524; IGR_1174/DR_1540<br>IGR_2690/DR_1595; IGR_2205/DR_1596<br>IGR_884/DR_1758; IGR_1449/DR_B0087                                                                                                                                                                                                             | 0.6787235  | 9.848279e-01 |
| Carotenoid biosynthesis | Ko00906     | IGR_771/DR_0801; IGR_2205/DR_0861<br>IGR_1662/DR_0862                                                                                                                                                                                                                                                                                                                                                | 0.8904877  | 9.848279e-01 |
| Two-component system    | Ko02020     | IGR_1662/DR_0023; IGR_1662/DR_0024<br>IGR_1662/DR_0926; IGR_2205/DR_0927<br>IGR_373/DR_0950; IGR_826/DR_0951<br>IGR_1662/DR_0952; IGR_2479/DR_0954                                                                                                                                                                                                                                                   | 0.08660762 | 9.848279e-01 |

|                       |         |                                      |           |              |
|-----------------------|---------|--------------------------------------|-----------|--------------|
|                       |         | IGR_2205/DR_A0009; IGR_1951/DR_A0010 |           |              |
|                       |         | IGR_388/DR_A0350; IGR_2572/DR_A0351  |           |              |
|                       |         | IGR_2408/DR_A0352; IGR_2205/DR_A0353 |           |              |
|                       |         | OsiA/DR_A0354; IGR_2408/DR_A0355     |           |              |
|                       |         | IGR_884/DR_B0083; IGR_2060/DR_B0086  |           |              |
|                       |         | IGR_1449/DR_B0087; IGR_1449/DR_B0088 |           |              |
| Vitamin B6 metabolism | Ko00750 | IGR_1449/DR_0341; IGR_2205/DR_0495   | 0.7335775 | 9.848279e-01 |
|                       |         | IGR_2060/DR_0596; IGR_1612/DR_1274   |           |              |
|                       |         | IGR_1449/DR_1366; IGR_2060/DR_1367   |           |              |
|                       |         | IGR_2590/DR_A0184; IGR_2408/DR_A0360 |           |              |

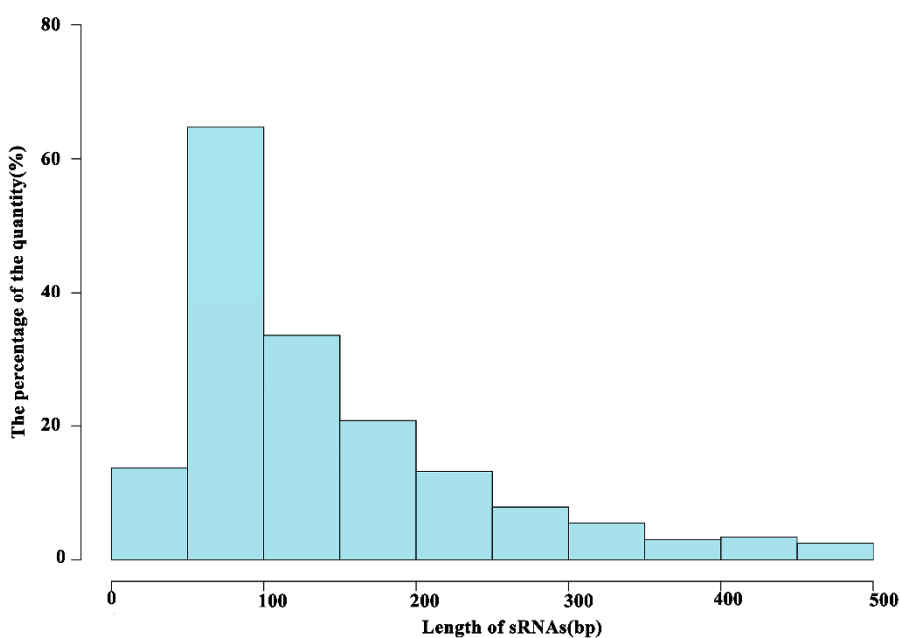

**Supplementary Figure 1.** The sRNA length distribution in *D. radiodurans* R1. The sRNA length (nt) is shown on the x-axis and the percentage of sRNA quantity is represented on the y-axis.

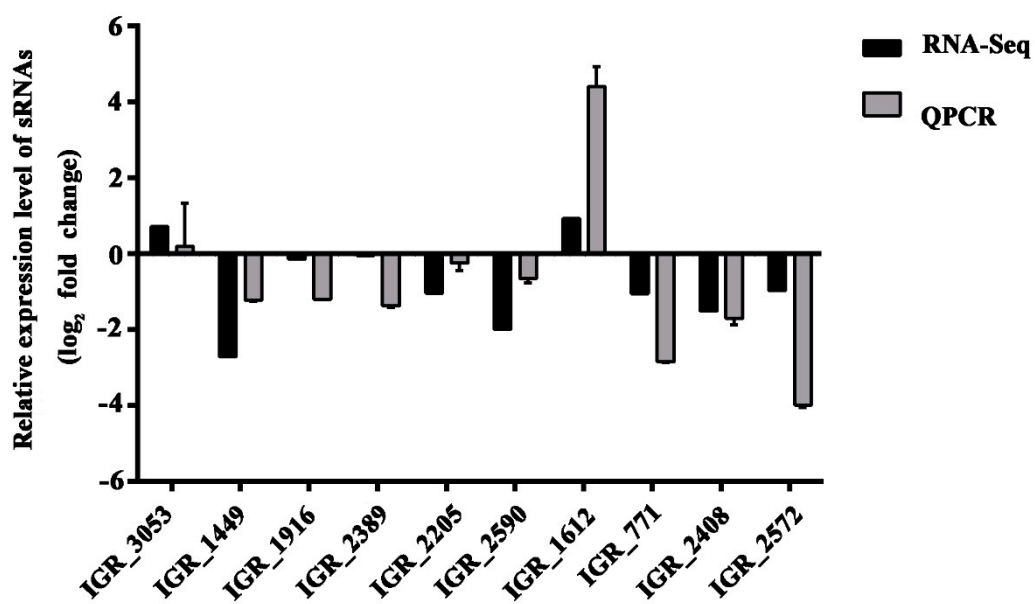

**Supplementary Figure 2.** qRT-PCR validation of 10 sRNAs identified by RNA-seq. Vertical values represent fold change ( $\log_2$ ) of small noncoding RNAs (sRNAs) at the transcriptional level after  $H_2O_2$  treatment.

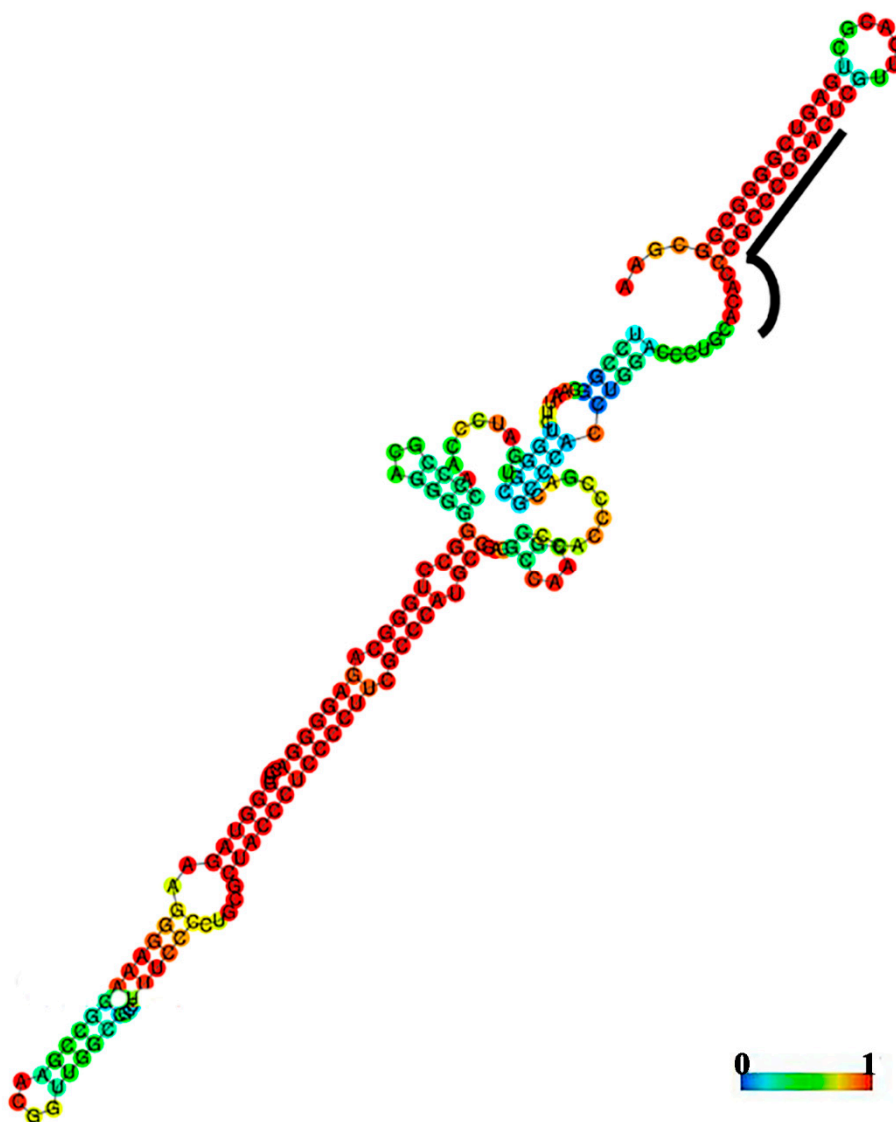

**Supplementary Figure 3.** The deduced second structure of OsiA. The black line in the figure represents the common areas on OsiA where each target gene is combined. The color legends represent base pair probabilities.
